# Supplementary material
Source: Springer Nature journal article supplement (https://www.springermedizin.de/resource/supplementary/12955_2013_1157_MOESM2_ESM.pdf/9558906)

+2 SD

-2 SD

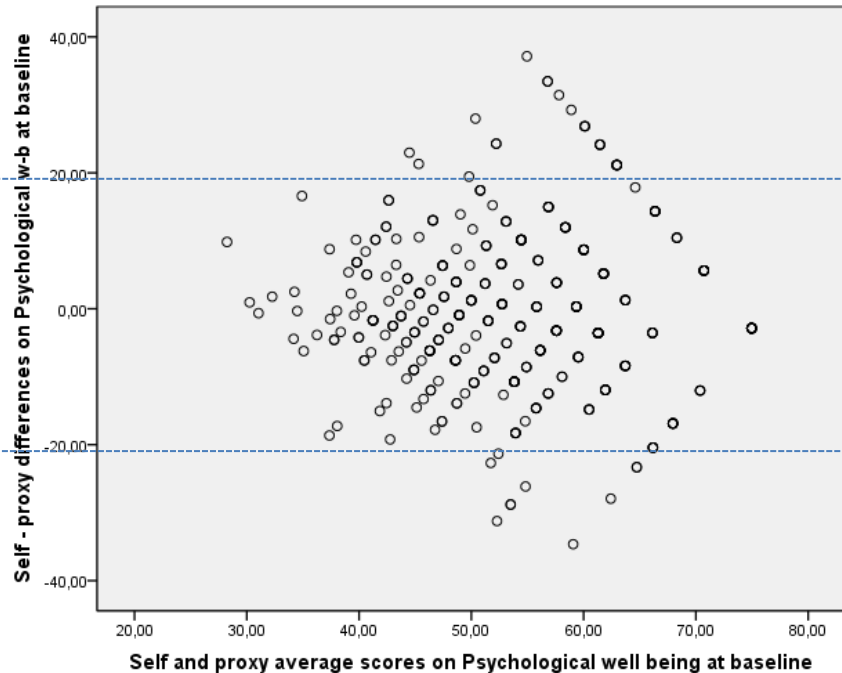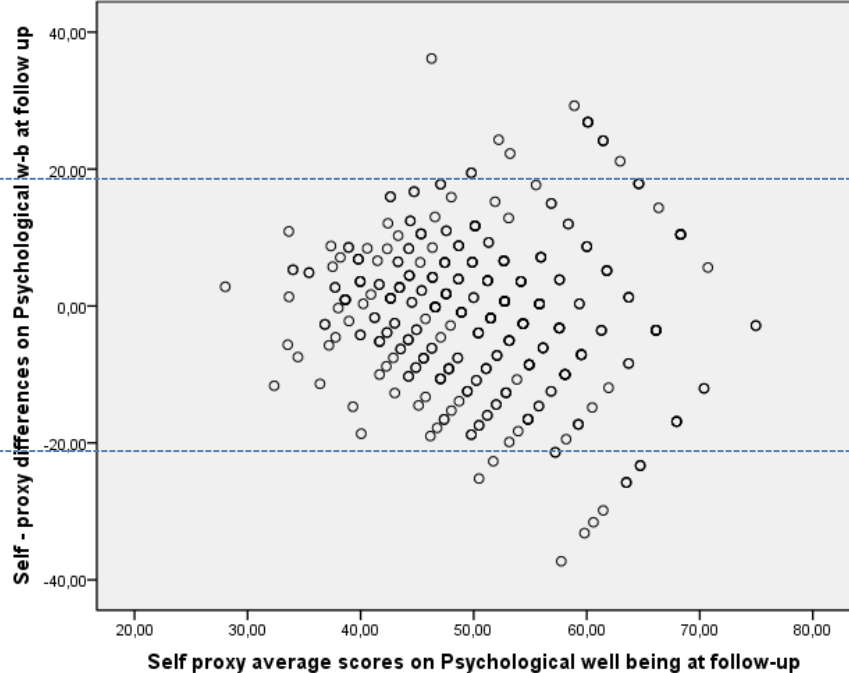

Supplement: MOESM2 [file 9558906]
